# Supplementary material for: Comparison of predicting value of triglyceride‑glucose indices family in cardiovascular disease risk over time: Insights from a 9-year nationwide prospective cohort study
Source: publisher site journal article supplement (doi:10.1515/jtim-2025-0017), 2025-04-01
Supplement: Supplementary file 1 [file jtim-2025-0017_sm.pdf]

**Table S1.** Characteristics of 4800 participants.

|                               | Baseline ( <i>n</i> = 4800) | Non-CVD <sup>a</sup> ( <i>n</i> = 3987) | CVD <sup>a</sup> ( <i>n</i> = 813) | <i>P</i> value |
|-------------------------------|-----------------------------|-----------------------------------------|------------------------------------|----------------|
| Gender                        |                             |                                         |                                    |                |
| Female                        | 2651 (55.23%)               | 2174 (54.53%)                           | 477 (58.67%)                       | 0.033          |
| Male                          | 2149 (44.77%)               | 1813 (45.47%)                           | 336 (41.33%)                       |                |
| Age                           | 57.00 (51.00, 63.00)        | 57.00 (51.00, 63.00)                    | 60.00 (54.00, 65.00)               | <0.001         |
| BMI                           | 23.16 (21.01, 25.66)        | 23.02 (20.89, 25.47)                    | 23.89 (21.55, 26.45)               | <0.001         |
| Hukou <sup>b</sup>            |                             |                                         |                                    |                |
| Agricultural                  | 4160 (86.70%)               | 3469 (87.03%)                           | 691 (85.10%)                       | 0.155          |
| Others                        | 638 (13.30%)                | 517 (12.97%)                            | 121 (14.90%)                       |                |
| Education <sup>b</sup>        |                             |                                         |                                    |                |
| Primary school or lower       | 3362 (70.06%)               | 2760 (69.24%)                           | 602 (74.05%)                       | 0.007          |
| Middle school or higher       | 1437 (29.94%)               | 1226 (30.76%)                           | 211 (25.95%)                       |                |
| Current Married               | 4348 (90.58)                | 3632 (91.10%)                           | 716 (88.07%)                       | 0.009          |
| Smoke <sup>b</sup>            | 1785 (37.22%)               | 1497 (37.58%)                           | 288 (35.42%)                       | 0.262          |
| Current drinking <sup>b</sup> | 1606 (33.49%)               | 1359 (34.12%)                           | 247 (30.38%)                       | 0.044          |
| Health Status                 |                             |                                         |                                    |                |
| Hypertension                  | 1003 (20.90%)               | 745 (18.69%)                            | 258 (31.73%)                       | <0.001         |
| Dyslipidemia                  | 484 (10.08%)                | 349 (8.75%)                             | 135 (16.61%)                       | <0.001         |
| Diabetes or High Blood Sugar  | 264 (5.50%)                 | 200 (5.02%)                             | 64 (7.87%)                         | 0.002          |
| Kidney Disease                | 303 (6.31%)                 | 238 (5.97%)                             | 65 (8.00%)                         | 0.037          |
| SBP <sup>b</sup>              | 126.00 (113.67, 140.67)     | 125.00 (113.33, 139.00)                 | 131.00 (117.00, 146.67)            | <0.001         |
| DBP <sup>b</sup>              | 74.33 (67.00, 82.67)        | 74.00 (66.67, 82.33)                    | 76.67 (69.00, 85.67)               | <0.001         |
| Pulse <sup>b</sup>            | 71.33 (65.00, 78.00)        | 71.33 (65.00, 78.00)                    | 71.67 (65.00, 77.67)               | 0.622          |
| BUN                           | 15.04 (12.52, 17.98)        | 15.07 (12.52, 18.04)                    | 14.99 (12.49, 17.81)               | 0.736          |
| FPG                           | 102.24 (94.32, 112.19)      | 101.88 (94.32, 111.78)                  | 103.32 (95.22, 114.12)             | 0.002          |
| Creatine <sup>b</sup>         | 0.75 (0.64, 0.87)           | 0.75 (0.64, 0.86)                       | 0.76 (0.66, 0.88)                  | 0.071          |
| TC                            | 190.98 (167.78, 215.34)     | 190.21 (167.01, 214.56)                 | 195.62 (171.65, 219.20)            | <0.001         |
| TG                            | 103.55 (74.34, 153.11)      | 103.55 (73.46, 152.22)                  | 110.63 (80.54, 158.42)             | <0.001         |
| HDL                           | 49.68 (40.59, 60.31)        | 49.87 (40.59, 60.31)                    | 49.10 (40.98, 58.76)               | 0.556          |
| LDL <sup>b</sup>              | 114.05 (93.94, 136.86)      | 113.66 (92.98, 136.08)                  | 118.69 (97.81, 139.76)             | <0.001         |
| CRP                           | 0.96 (0.53, 1.95)           | 0.92 (0.52, 1.92)                       | 1.12 (0.59, 2.15)                  | <0.001         |
| HbA1c <sup>b</sup>            | 5.10 (4.90, 5.40)           | 5.10 (4.90, 5.40)                       | 5.20 (4.90, 5.50)                  | <0.001         |
| Uric acid                     | 4.21 (3.51, 5.06)           | 4.21 (3.50, 5.04)                       | 4.25 (3.56, 5.12)                  | 0.129          |
| Cystatin C <sup>b</sup>       | 0.96 (0.85, 1.09)           | 0.95 (0.85, 1.08)                       | 0.97 (0.87, 1.12)                  | 0.006          |
| TyG                           | 8.59 (8.22, 9.03)           | 8.57 (8.20, 9.01)                       | 8.68 (8.30, 9.13)                  | <0.001         |

|                    |                      |                            |                            |                 |
|--------------------|----------------------|----------------------------|----------------------------|-----------------|
| TyG-BMI            | 199.13<br>228.60)    | (176.53, 197.64<br>225.27) | (175.51, 209.57<br>236.79) | (184.94, <0.001 |
| Cumulative TyG     | 25.84 (24.86, 27.09) | 25.80 (24.81, 27.04)       | 26.08 (25.14, 27.23)       | <0.001          |
| Cumulative TyG-BMI | 606.42<br>689.23)    | (535.07, 601.68<br>684.41) | (532.45, 633.83<br>712.25) | (558.61, <0.001 |

a. Cardiovascular disease is defined as heart problems and stroke. The CVD and non-CVD groups were based on the result of a 9-year follow-up

b. Missing data: 2 for Hukou status, 1 for education, 4 for current drinking, 4 for smoking, 19 for SBP, 19 for DBP, 19 for pulse, 10 for LDL, 2 for creatine, 27 for HbA1c, 1254 for cystatin C.

c. current drinking is considered any drinking in the last year.

d. Abbreviations: BMI, body mass index; SBP, systolic blood pressure; DBP, diastolic blood pressure; BUN, blood urea nitrogen; FPG, fasting plasma glucose; TC, total cholesterol; TG, triglycerides; HDL, high-density lipoprotein cholesterol; LDL, low-density lipoprotein cholesterol; CRP, C-reaction protein; HbA1c, glycosylated Hemoglobin A1c; TyG, triglyceride-glucose.

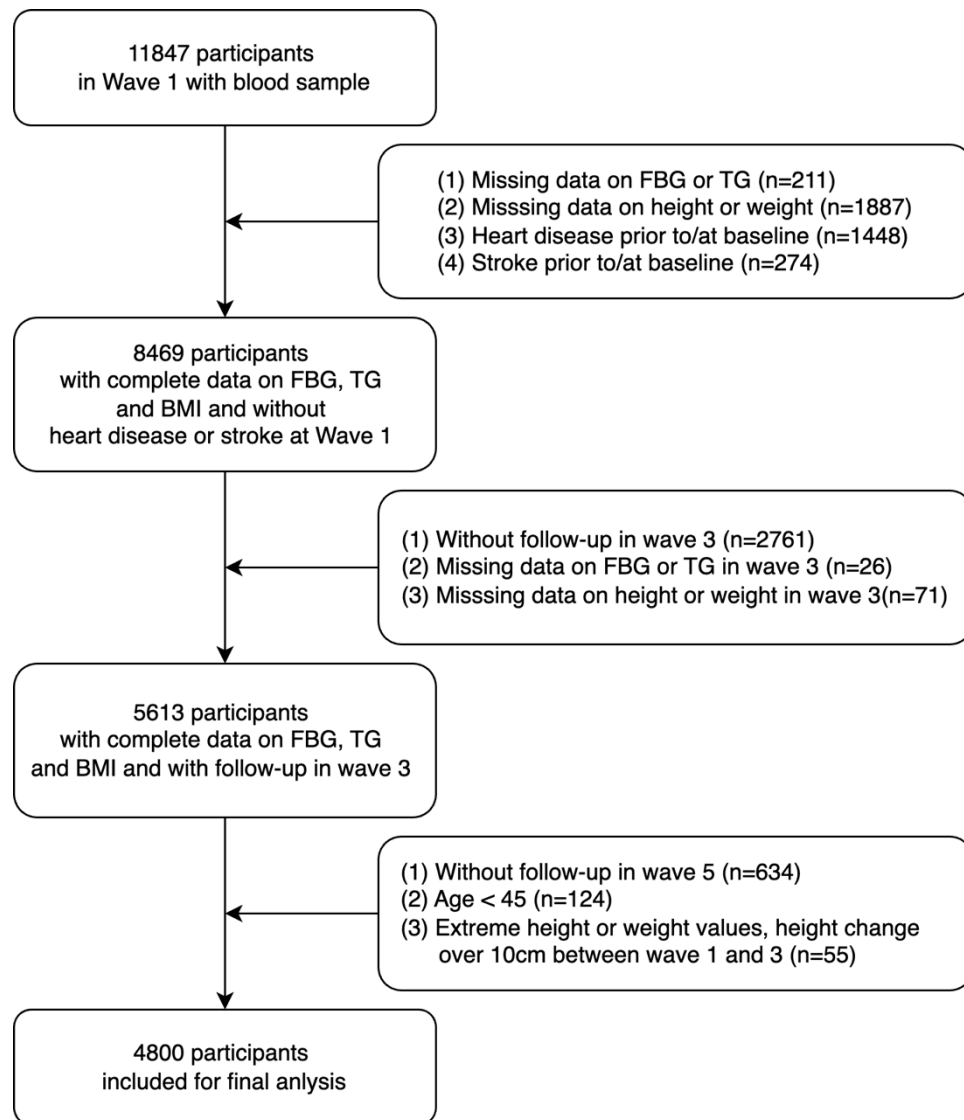

**Figure S1:** Study population selection flowchart.

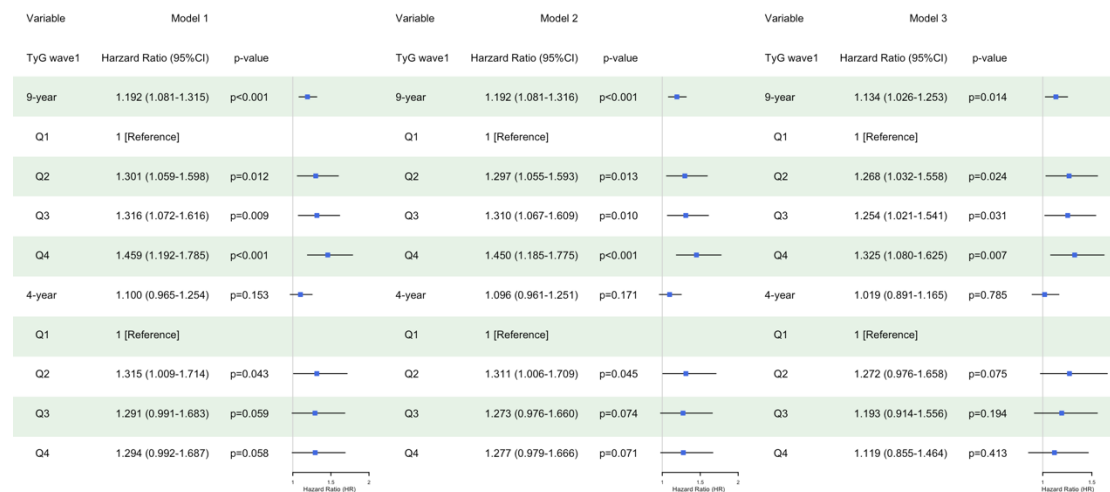

**Figure S2:** Relationships between TyG index and CVD. Model 1 was adjusted for age and gender. Model 2 included additional adjustments for residence, educational level, marital status, smoking status, and current drinking status. Model 3 incorporated adjustments as model 2 plus hypertension and kidney disease. TyG, triglyceride-glucose; CVD, cardiovascular diseases, HR, hazard ratio; CI, confidence interval; Q, quartile.

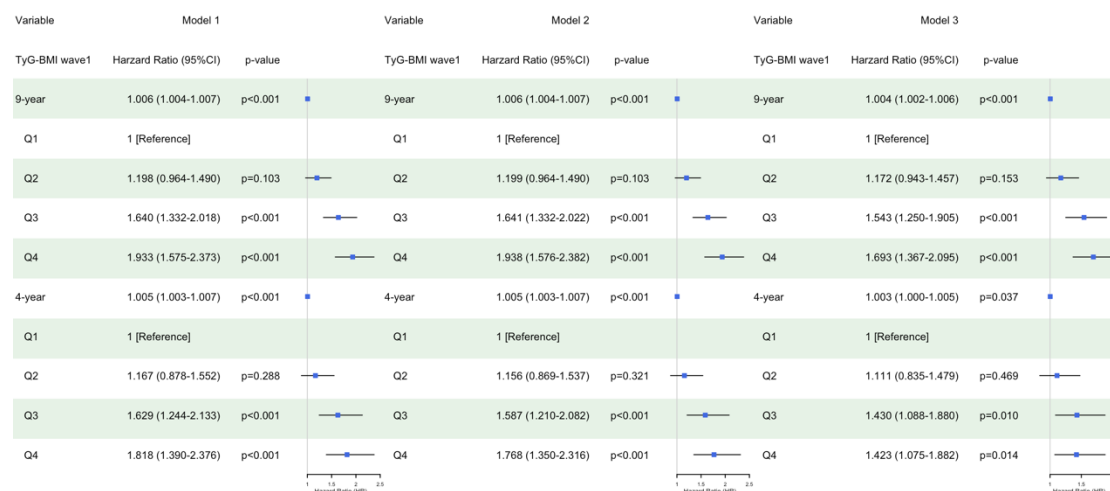

**Figure S3:** Relationships between TyG-BMI and CVD. Model 1 was adjusted for age and gender. Model 2 included additional adjustments for residence, educational level, marital status, smoking status, and current drinking status. Model 3 incorporated adjustments as model 2 plus hypertension and kidney disease. TyG, triglyceride-glucose; BMI, body mass index; CVD, cardiovascular diseases; HR, hazard ratio; CI, confidence interval; Q, quartile.

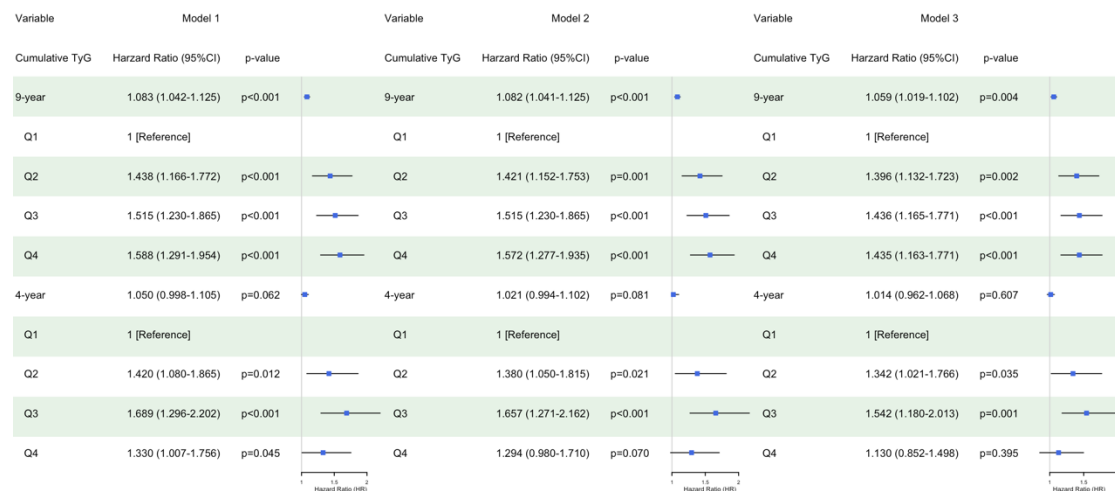

**Figure S4:** Relationships between cumulative TyG index and CVD. Model 1 was adjusted for age and gender. Model 2 included additional adjustments for residence, educational level, marital status, smoking status, and current drinking status. Model 3 incorporated adjustments as model 2 plus hypertension and kidney disease. TyG, triglyceride-glucose; CVD, cardiovascular diseases, HR, hazard ratio; CI, confidence interval; Q, quartile.

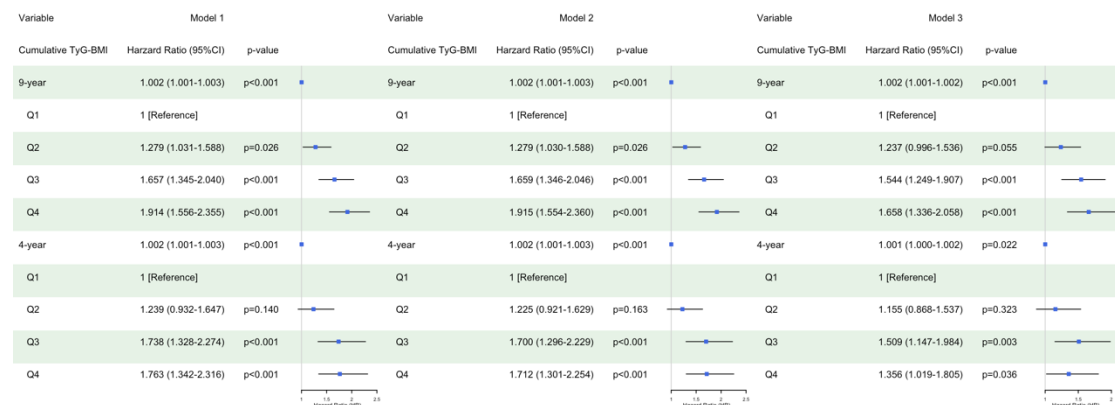

**Figure S5:** Relationships between cumulative TyG-BMI and CVD. Model 1 was adjusted for age and gender. Model 2 included additional adjustments for residence, educational level, marital status, smoking status, and current drinking status. Model 3 incorporated adjustments as model 2 plus hypertension and kidney disease. TyG, triglyceride-glucose; BMI, body mass index; CVD, cardiovascular diseases; HR, hazard ratio; CI, confidence interval; Q, quartile.

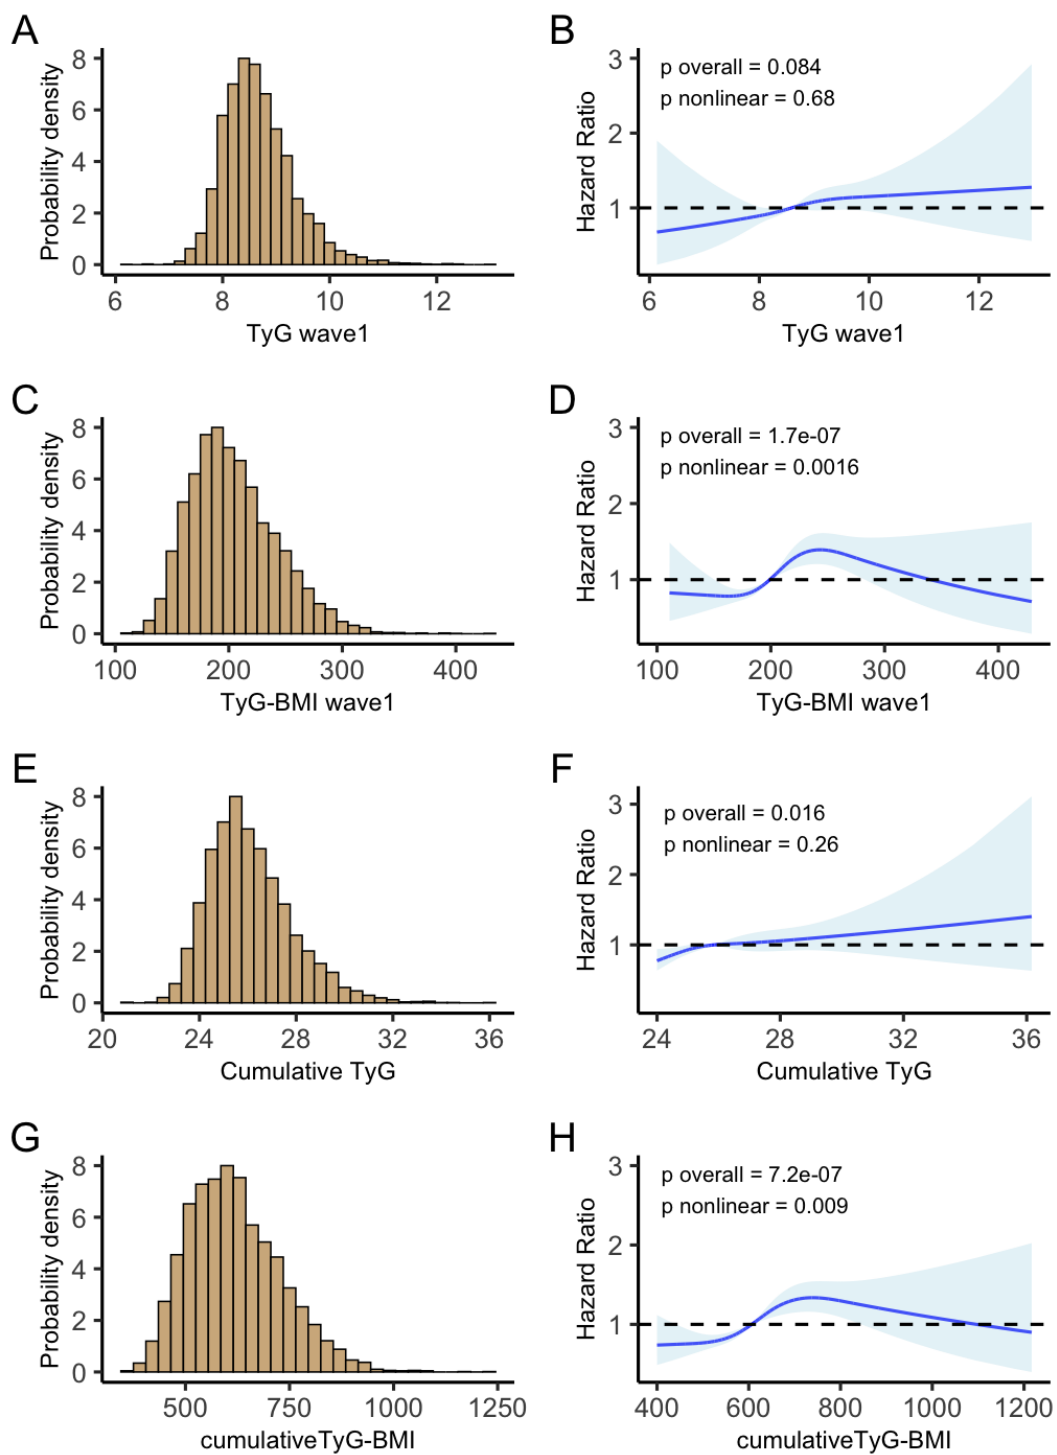

**Figure S6:** Nonlinear associations of TyG indices family with CVD. A, C, E, G Distribution for TyG, TyG-BMI, cumulative TyG, and cumulative TyG-BMI; B, D, F, H Graphs show HR for CVD adjusted for age, gender, residence, education level, marital status, smoking status, current drinking status, hypertension, and kidney disease. Data was analyzed using Cox proportional hazards regression models. Solid lines represent the HRs, and shaded areas show the 95% CI. TyG, triglyceride-glucose; BMI, body mass index; CVD, cardiovascular diseases; HR, hazard ratio; CI, confidential interval.
